# Supplementary material for: Maternal Fructose Exposure Programs Metabolic Syndrome-Associated Bladder Overactivity in Young Adult Offspring
Source: PubMed Central journal article supplement (PMC5050417; doi:10.1038/srep34669), 2016-10-05

**Maternal Fructose Exposure Programs Metabolic Syndrome-Associated Bladder  
Overactivity in Young Adult Offspring**

**Wei-Chia Lee, M.D. Ph.D.<sup>1</sup>, You-Lin Tain, M.D. Ph.D.<sup>2,3</sup>, Kay L.H. Wu, Ph.D.<sup>3</sup>,**

**Steve Leu, Ph.D.<sup>3</sup>, Julie Y.H. Chan. Ph.D.<sup>3\*</sup>**

<sup>1</sup>Division of Urology, Kaohsiung Chang Gung Memorial Hospital and Chang Gung University College of Medicine, Kaohsiung; <sup>2</sup>Department of pediatrics, Kaohsiung Chang Gung Memorial Hospital and Chang Gung University College of Medicine, Kaohsiung, Taiwan; <sup>3</sup> Institute for Translational Research in Biomedicine, Kaohsiung Chang Gung Memorial Hospital, Kaohsiung, Taiwan

**\*Address correspondence and reprint requests to:** Julie Y.H. Chan. Ph.D., Institute for Translational Research in Biomedicine, Kaohsiung Chang Gung Memorial Hospital, 123 Ta Pei Rd., Kaohsiung City 83301, Taiwan, Republic of China, e-mail: [jchan@adm.cgmh.org.tw](mailto:jchan@adm.cgmh.org.tw), Tel. 886 7-7338415;

Fax: 886-7-7338415.

## Supplementary Table S1

### Oligonucleotide sequence details of all primers

---

#### Chrm2

Forward 5'-AGCCCGCAAAATCGTGAA-3'  
Reverse 5'-GACATTGTATGGCGCCCAC-3'

#### Chrm3

Forward 5'-ACCAACTCCTCGGCAGACAA-3'  
Reverse 5'-GCGACATCCTCTTCCGCTT-3'

#### P2rx1

Forward 5'-ACTCAAGGCCATTGTGCAG-3'  
Reverse 5'-CACAGTTGCCTGTGCGAAT-3'

#### Vipr2

Forward 5'-CCGAGGATGAGAGTAAGATCACG-3'  
Reverse 5'-AGATGGCTCTCAGCATGAAGG-3'

#### Trpv4

Forward 5'-GAAGTGTCCGGTGCTGGAGAT-3'  
Reverse 5'-ACTTGTCCCTCAGCAGTTCG-3'

#### Tgfa

Forward 5'-GCAGTGGTGTCTCACTTCAA -3'  
Reverse 5'-CACTGCCAGGAGATCTGCATGCTC-3'

#### P2ry1

Forward 5'- TGACGGTGTTTGCTGTGTCT-3'  
Reverse 5'- GGTGGCATAAACCTGTTCGT-3'

#### Pdgd

Forward 5'- CAGAGCGCATCCATCAAAGC-3'  
Reverse 5'- GCCTGTCACCCGAATGTTCT -3'

---

## Supplementary Figure S2

### Full-length blots/gels of bladder functional proteins

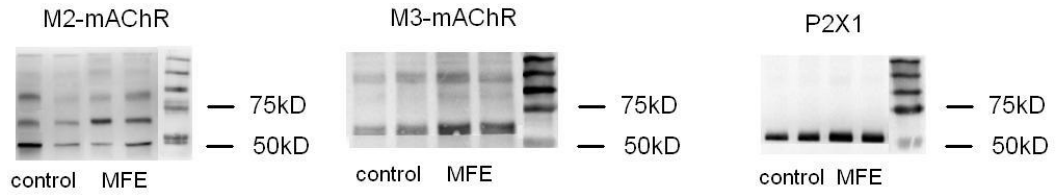

Supplement: srep34669-s1.pdf [file srep34669-s1.pdf]
